# Supplementary material
Source: PubMed Central journal article supplement (PMC3009556)
Supplement: NIHMS230454-supplement-01.pdf [file NIHMS230454-supplement-01.pdf]

# 1 **Zama\_Uzumcu, Supplemental Material**

## 2 **Techniques used in epigenetic analyses**

3 When examining tissues for potential epigenetic alterations, methylation has been  
4 primarily analyzed as a first step, [1; 2] since it is preserved in genomic DNA after  
5 multiple extraction and purification steps, whereas histone associations with DNA are  
6 more labile and dependent on the conditions of extraction. However, in light of the fact  
7 that in some cases, histone modifications lead the way for the establishment of epigenetic  
8 marks (see Section 2.2 in the main manuscript), techniques to detect these modifications  
9 should be performed in tandem. Numerous articles are available for detailed information  
10 on techniques used to study methylation and histone modifications to which the readers  
11 are referred [3; 4; 5]. Here we summarize, in brief, the options available for choosing an  
12 appropriate technique (see Figure 1 in the main manuscript).

13

### 14 **1. Bisulfite treatment and sequencing**

15 The bisulfite-sequencing technique has remained the gold standard analysis, to obtain  
16 detailed gene-specific CGI methylation information [6]. Bisulfite conversion refers to the  
17 chemical reaction where all cytosine residues are converted to uracils by deamination.  
18 This is followed by the conversion of uracil to thymine in double stranded DNA  
19 (dsDNA), after PCR. Methylated cytosines are protected by the actions of bisulfite and  
20 therefore remain as cytosines in the dsDNA. Subsequent direct sequencing of the PCR  
21 product or cloning and sequencing and comparison to the original DNA sequence identify  
22 the cytosines that were methylated vs unmethylated in the genomic DNA. More

23 sophisticated sequencing techniques now allow for high-throughput analysis with either  
24 typical Sanger sequencing [7] or pyrosequencing [8; 9] or mass spectrometry [10].  
25 While detailed cancer epigenome studies have been conducted for many years [3; 11],  
26 recent environmental exposure studies have necessitated the examination of the whole  
27 epigenome and not just individual genes. Genome-wide studies are needed to identify  
28 new networks/pathways that are potentially altered due to environmental exposures.  
29 These involve either restriction enzyme (RE) digestions at methylation sensitive sites or  
30 the immunoprecipitation of methyl cytosine residues (e.g. MeDIP) followed by genomic  
31 arrays or high throughput sequencing. Combinations of these techniques alongside  
32 chromatin immunoprecipitation (ChIP) assays have given rise to a wide range of choices  
33 that can be employed to study epigenetic alterations due to environmental exposures.

34

## 35 **2. Global methylation assays**

### 36 **2.1. Restriction enzyme (RE) digestion-based methods**

37 Restriction landmark genomic scanning (RLGS), methylation sensitive restriction  
38 fingerprinting (MSRF) and methylation sensitive arbitrarily-primed PCR (AP-PCR) are  
39 RE digestion based techniques that are used to explore genome-wide methylation  
40 changes. These assays can be conducted in-house or on comparative genomic arrays as  
41 described in section 2.3.1.

42 **RLGS.** A RE digestion is conducted with the methylation sensitive NotI whose  
43 recognition site is found in nearly 2400 sequences across the genome, predominantly near  
44 CpG rich regions [12]. *NotI* digests only non-methylated CpG recognition sites, but does  
45 not digest methylated CpG sites. Following further digestion with *HinfI* and *EcoRV*, 2-D

46 gel electrophoresis, and autoradiographic detection, the status of methylation in the  
47 specific RE products from different samples, is characterized by presence/absence of  
48 spots and their intensity, between the samples. After the changes are documented, the RE  
49 products can be sequenced and matched to genome databases for identification [13; 14;  
50 15]. The advantage of using RLGS is its ability to identify thousands of landmarks in a  
51 single run, in a copy number specific manner. However, the use of *NotI* RE site alone as  
52 an identifying parameter restricts the potential candidates to be only in CpG rich regions  
53 and only visually identifies hypomethylated sites. On the other hand the latter can be an  
54 advantage since most other assays demonstrate the presence of hypomethylated  
55 sequences by the absence of a signal, for which there can be a myriad of confounding  
56 technical reasons.

57 **MSRF.** In MSRF, genomic DNA is subjected to *MseI* digestion, which does not cut in  
58 CpG rich regions but allows for genomic DNA to be further digested. Subsequently,  
59 *BstUI* (a methylation-sensitive enzyme) RE digestion is conducted on an aliquot of the  
60 *MseI* digested sample. Since *BstUI* will digest only those sites that are not protected by  
61 methylation, a differential display of products is possible after PCR and polyacrylamide  
62 gel electrophoresis (PAGE). Potential candidates are then isolated followed by  
63 reamplification of the samples, sequencing, and database searches that reveal the  
64 identities of the candidate genes [1].

65

66 **AP-PCR.** AP-PCR is very similar to MSRF except that a pair of restriction enzymes that  
67 are isoschizomers are employed. There are various combinations of methylation-sensitive  
68 and insensitive enzymes that can be used, the most common ones being *HpaII* and *MspI*,

69 respectively (another example: methylation-sensitive *SmaI* and methylation-insensitive  
70 *XmaI*). In brief, genomic DNA is digested with an RE (global cutter) in combination with  
71 methylation-sensitive *HpaII* that cuts only if both cytosines in the site are unmethylated,  
72 or methylation-insensitive *MspI* enzymes that only cuts at the outer cytosine regardless  
73 of the methylation status [16]. This is followed by PCR using degenerate primer sets  
74 designed to amplify methylation sites PCR products are separated using PAGE and  
75 visualized by SYBR green nucleic acid staining. Hypo- or hypermethylation is  
76 determined by the relative band intensity or presence/absence of bands between the  
77 various samples. The differentially amplified products are isolated, reamplified, and  
78 sequenced. The identity and chromosomal location is determined by sequence alignment  
79 to known genome databases [2; 17].

80

81 ***Variations of RE digestion based methods.*** *HpaII* tiny fragment enrichment by ligation-  
82 mediated PCR (HELP) and differential methylation hybridization (DMH) are variations  
83 on the technique employing *HpaII* and *MspI*, except that the RE-digested DNA is  
84 amplified, ligated to adapters, and labeled with fluorescent dyes or radioactive moieties  
85 such as <sup>32</sup>P, and used as probe(s) on high density genomic arrays (HELP) or low density  
86 arrays (DMH) [18; 19; 20].

87

## 88 **2.2. Immunoprecipitation-based methods**

89 **2.2.1. Methylated DNA immunoprecipitation (MedIP) and methyl binding domain**  
90 **affinity purification (MAP)**

91 In MeDIP, an anti-methylcystosine antibody (usually a monoclonal antibody) is used to  
92 immunoprecipitate methylated DNA providing an unbiased means to enrich methylated  
93 genomic DNA. This method can provide a 90% enrichment of the methylated DNA in a  
94 dose-dependent, sequence-independent manner. Immunoprecipitated DNA and input  
95 DNA are labeled differentially and competitively hybridized to genomic arrays (see  
96 section below, [21; 22]).

97 Alternatively, in MAP, an affinity column that contains the methyl-CpG binding domain  
98 of the MeCP2 protein is prepared that allows for the isolation of CGIs from genomic  
99 DNA [23]; this principle is being used extensively in epigenome analysis [24]. Similar to  
100 MeDIP, the MAPed DNA and the input DNA are then labeled with different dyes and  
101 hybridized to the genomic arrays to determine differentially methylated sequences.

102

### 103 **2.3. Detection methods**

#### 104 **2.3.1. Array-based technologies—comparative genomic arrays/CGI arrays**

105 The techniques mentioned in section 2.1 provide potential candidates that are isolated,  
106 sequenced and then identified by matching to genome databases which is time consuming  
107 and low-coverage. With microarray technology, the platform is widened to encompass  
108 large-scale genome analysis with multiple regions of the same gene or the whole genome  
109 arrayed on a chip. For example, in Affymetrix GeneChip arrays, methylation of a single  
110 gene or limited number of genes that span short regions of the genome can be examined.  
111 Multiple short oligonucleotides that are designed to anneal to the methylated or  
112 unmethylated versions of the queried sequence are synthesized and arrayed on a chip.  
113 RE-digested, immunoprecipitated DNA or bisulfite-treated DNA from different samples

114 are labeled with a fluorescent dye. After hybridization with the oligonucleotide array, the  
115 signal intensity at each spot is compared between the methylated and unmethylated CGIs,  
116 which is then expressed as a percentage for the whole gene. Since this method provides  
117 good coverage of each queried sequence, resolution of 2-3 CpGs can be obtained [25].  
118 However, these arrays require single channel hybridization i.e., running each sample  
119 separately and conducting at least three repeats. On the other hand, there are recently  
120 available commercial arrays from Nimblegen and Agilent that employ dual channel (two  
121 samples) hybridization: the treated DNA vs the native input DNA are labeled with  
122 different fluorescent dyes and hybridized simultaneously thus reducing inter-array  
123 variations and need for technical replicates. These rely on arrays with longer  
124 oligonucleotide sequences (~60 mers vs the ~20 mers used in Affymetrix arrays)  
125 covering the promoter region CGIs alone or CGIs both upstream and downstream of the  
126 transcription start site or the whole genome. Furthermore, custom arrays are available  
127 with these platforms making them more attractive for examining whole pathways that  
128 could be queried at one time [5; 18; 26].

129

### 130 **2.3.2. Deep sequencing/pyrosequencing**

131 Multiple generations of high throughput methylation arrays have now been more  
132 empowered with the advent of these very sophisticated sequencing techniques. Massively  
133 parallel sequencing of thousands to millions of DNA sequences at a time using variations  
134 of the classical Sanger technique or pyrosequencing are now available. These allow for  
135 very extensive coverage and higher resolution and also bypassing any pretreatments or  
136 hybridization to arrays.

137 Platforms are now available to conduct deep sequencing, using pyrosequencing (for  
138 example, 454 Sequencing, from Roche) that involves RE digestion with methylation  
139 sensitive and insensitive isoschizomers and subsequent polymerase reactions. As the  
140 nucleotides are added, inorganic pyrophosphate (PPi) is released and converted to ATP  
141 by ATP-sulfurylase and adenosine-5-phosphosulfate. This reaction is coupled to the  
142 conversion of luciferin to oxyluciferin by luciferase and ATP to generate a proportional  
143 amount of visible light, which is quantified by a charge-coupled-device camera in the  
144 pyrosequencer. Since the restriction digests have differential number of cut sites and  
145 overhangs, the signal intensities corresponding to individual nucleotides are  
146 representative of the methylated cytosine vs the unmethylated cytosine. This method is  
147 able to provide up to 400,000 reads of over 100 bases per run [8]. An alternative system  
148 (e.g., Illumina Genome Analyzer, generally referred to as Solexa sequencing system)  
149 employs bead arrays, which provide shorter runs of 25-35 bases but up to 40 million  
150 reads. Shotgun sequencing is conducted after genomic DNA is fragmented, ligated to  
151 PCR primer adapters, and bisulfite converted [27; 28; 29].

152

## 153 **2.4. Detection of histone modifications**

### 154 **2.4.1. Chromatin immunoprecipitation (ChIP)**

155 Analysis of histone modifications is usually conducted with ChIP analysis in addition to  
156 the widely employed immunohistochemistry [24]. In brief, ChIP involves the isolation of  
157 chromatin from cells that are treated with crosslinking reagents to covalently link the  
158 DNA-binding proteins to chromatin. After the cells are lysed, the genomic DNA is  
159 isolated and sonicated to obtain sheared chromatin. Immunoprecipitation is conducted

160 with an antibody against the protein of interest and the DNA fragments isolated. This  
161 DNA can then be used in quantitative real time PCR (QPCR) to quantify the target DNA  
162 or on other cutting edge platforms such as ChIP–chip or ChIP-seq. The former involves  
163 hybridization to a tiling array and the latter involves high throughput /deep sequencing of  
164 the DNA fragments [30; 31].

165 Micro-RNA studies employ classical mRNA detection methods such as Northern  
166 hybridizations and microarray analysis. We refer the readers to a recent article by Hunt  
167 and colleagues on new, more sensitive and reliable techniques being developed to detect  
168 and study micro-RNAs [32].

## 169 **References**

- 170
- 171 [1] W.Y. Tang, R. Newbold, K. Mardilovich, W. Jefferson, R.Y. Cheng, M. Medvedovic,  
172 and S.M. Ho, Persistent hypomethylation in the promoter of nucleosomal binding  
173 protein 1 (Nsbp1) correlates with overexpression of Nsbp1 in mouse uteri  
174 neonatally exposed to diethylstilbestrol or genistein. *Endocrinology* 149 (2008)  
175 5922-31.
- 176 [2] M.D. Anway, A.S. Cupp, M. Uzumcu, and M.K. Skinner, Epigenetic  
177 transgenerational actions of endocrine disruptors and male fertility. *Science* 308  
178 (2005) 1466-9.
- 179 [3] M.M. Suzuki, and A. Bird, DNA methylation landscapes: provocative insights from  
180 epigenomics. *Nat Rev Genet* 9 (2008) 465-76.
- 181 [4] S.M. Ho, and W.Y. Tang, Techniques used in studies of epigenome dysregulation due  
182 to aberrant DNA methylation: An emphasis on fetal-based adult diseases. *Reprod*  
183 *Toxicol* (2007).
- 184 [5] D. Zilberman, and S. Henikoff, Genome-wide analysis of DNA methylation patterns.  
185 *Development* 134 (2007) 3959-65.
- 186 [6] S.J. Clark, J. Harrison, C.L. Paul, and M. Frommer, High sensitivity mapping of  
187 methylated cytosines. *Nucleic Acids Res* 22 (1994) 2990-7.
- 188 [7] F. Eckhardt, J. Lewin, R. Cortese, V.K. Rakyán, J. Attwood, M. Burger, J. Burton,  
189 T.V. Cox, R. Davies, T.A. Down, C. Haefliger, R. Horton, K. Howe, D.K.  
190 Jackson, J. Kunde, C. Koenig, J. Liddle, D. Niblett, T. Otto, R. Pettett, S.  
191 Seemann, C. Thompson, T. West, J. Rogers, A. Olek, K. Berlin, and S. Beck,  
192 DNA methylation profiling of human chromosomes 6, 20 and 22. *Nat Genet* 38  
193 (2006) 1378-85.
- 194 [8] Y. Korshunova, R.K. Maloney, N. Lakey, R.W. Citek, B. Bacher, A. Budiman, J.M.  
195 Ordway, W.R. McCombie, J. Leon, J.A. Jeddloh, and J.D. McPherson,  
196 Massively parallel bisulphite pyrosequencing reveals the molecular complexity of

197 breast cancer-associated cytosine-methylation patterns obtained from tissue and  
198 serum DNA. *Genome Res* 18 (2008) 19-29.

199 [9] J. Tost, H. El abdalaoui, and I.G. Gut, Serial pyrosequencing for quantitative DNA  
200 methylation analysis. *Biotechniques* 40 (2006) 721-2, 724, 726.

201 [10] M. Ehrlich, M.R. Nelson, P. Stanssens, M. Zabeau, T. Liloglou, G. Xinarianos, C.R.  
202 Cantor, J.K. Field, and D. van den Boom, Quantitative high-throughput analysis  
203 of DNA methylation patterns by base-specific cleavage and mass spectrometry.  
204 *Proc Natl Acad Sci U S A* 102 (2005) 15785-90.

205 [11] A.H. Ting, K.M. McGarvey, and S.B. Baylin, The cancer epigenome--components  
206 and functional correlates. *Genes Dev* 20 (2006) 3215-31.

207 [12] I. Hatada, Y. Hayashizaki, S. Hirotsune, H. Komatsubara, and T. Mukai, A genomic  
208 scanning method for higher organisms using restriction sites as landmarks. *Proc*  
209 *Natl Acad Sci U S A* 88 (1991) 9523-7.

210 [13] J.F. Costello, C. Hong, C. Plass, and D.J. Smiraglia, Restriction landmark genomic  
211 scanning: analysis of CpG islands in genomes by 2D gel electrophoresis. *Methods*  
212 *Mol Biol* 507 (2009) 131-48.

213 [14] F.L. Lopes, A.L. Fortier, N. Darricarrere, D. Chan, D.R. Arnold, and J.M. Trasler,  
214 Reproductive and epigenetic outcomes associated with aging mouse oocytes.  
215 *Hum Mol Genet* 18 (2009) 2032-44.

216 [15] K.D. Sinclair, C. Allegrucci, R. Singh, D.S. Gardner, S. Sebastian, J. Bispham, A.  
217 Thurston, J.F. Huntley, W.D. Rees, C.A. Maloney, R.G. Lea, J. Craigon, T.G.  
218 McEvoy, and L.E. Young, DNA methylation, insulin resistance, and blood  
219 pressure in offspring determined by maternal periconceptional B vitamin and  
220 methionine status. *Proc Natl Acad Sci U S A* 104 (2007) 19351-6.

221 [16] C. Korch, and P. Hagblom, In-vivo-modified gonococcal plasmid pJD1. A model  
222 system for analysis of restriction enzyme sensitivity to DNA modifications. *Eur J*  
223 *Biochem* 161 (1986) 519-24.

224 [17] C.X. Zhong, and M.J. Mass, Both hypomethylation and hypermethylation of DNA  
225 associated with arsenite exposure in cultures of human cells identified by  
226 methylation-sensitive arbitrarily-primed PCR. *Toxicol Lett* 122 (2001) 223-34.

227 [18] B. Khulan, R.F. Thompson, K. Ye, M.J. Fazzari, M. Suzuki, E. Stasiak, M.E.  
228 Figueroa, J.L. Glass, Q. Chen, C. Montagna, E. Hatchwell, R.R. Selzer, T.A.  
229 Richmond, R.D. Green, A. Melnick, and J.M. Greally, Comparative isoschizomer  
230 profiling of cytosine methylation: the HELP assay. *Genome Res* 16 (2006) 1046-  
231 55.

232 [19] M. Oda, and J.M. Greally, The HELP assay. *Methods Mol Biol* 507 (2009) 77-87.

233 [20] L.C. Alworth, K.L. Howdeshell, R.L. Ruhlen, J.K. Day, D.B. Lubahn, T.H. Huang,  
234 C.L. Besch-Williford, and F.S. vom Saal, Uterine responsiveness to estradiol and  
235 DNA methylation are altered by fetal exposure to diethylstilbestrol and  
236 methoxychlor in CD-1 mice: effects of low versus high doses. *Toxicol Appl*  
237 *Pharmacol* 183 (2002) 10-22.

238 [21] K.L. Thu, E.A. Vucic, J.Y. Kennett, C. Heryet, C.J. Brown, W.L. Lam, and I.M.  
239 Wilson, Methylated DNA immunoprecipitation. *J Vis Exp* (2009).

240 [22] M. Weber, J.J. Davies, D. Wittig, E.J. Oakeley, M. Haase, W.L. Lam, and D.  
241 Schubeler, Chromosome-wide and promoter-specific analyses identify sites of

242 differential DNA methylation in normal and transformed human cells. *Nat Genet*  
243 37 (2005) 853-62.

244 [23] S.H. Cross, J.A. Charlton, X. Nan, and A.P. Bird, Purification of CpG islands using  
245 a methylated DNA binding column. *Nat Genet* 6 (1994) 236-44.

246 [24] E. Ballestar, M.F. Paz, L. Valle, S. Wei, M.F. Fraga, J. Espada, J.C. Cigudosa, T.H.  
247 Huang, and M. Esteller, Methyl-CpG binding proteins identify novel sites of  
248 epigenetic inactivation in human cancer. *Embo J* 22 (2003) 6335-45.

249 [25] R.S. Gitan, H. Shi, C.M. Chen, P.S. Yan, and T.H. Huang, Methylation-specific  
250 oligonucleotide microarray: a new potential for high-throughput methylation  
251 analysis. *Genome Res* 12 (2002) 158-64.

252 [26] M.R. Estecio, and J.P. Issa, Tackling the methylome: recent methodological  
253 advances in genome-wide methylation profiling. *Genome Med* 1 (2009) 106.

254 [27] M. Bibikova, Z. Lin, L. Zhou, E. Chudin, E.W. Garcia, B. Wu, D. Doucet, N.J.  
255 Thomas, Y. Wang, E. Vollmer, T. Goldmann, C. Seifart, W. Jiang, D.L. Barker,  
256 M.S. Chee, J. Floros, and J.B. Fan, High-throughput DNA methylation profiling  
257 using universal bead arrays. *Genome Res* 16 (2006) 383-93.

258 [28] J.B. Fan, K.L. Gunderson, M. Bibikova, J.M. Yeakley, J. Chen, E. Wickham Garcia,  
259 L.L. Lebruska, M. Laurent, R. Shen, and D. Barker, Illumina universal bead  
260 arrays. *Methods Enzymol* 410 (2006) 57-73.

261 [29] S. Liang, Y. Lu, J. Jelinek, M. Estecio, H. Li, and J.P. Issa, Analysis of epigenetic  
262 modifications by next generation sequencing. *Conf Proc IEEE Eng Med Biol Soc*  
263 1 (2009) 6730.

264 [30] C.E. Massie, and I.G. Mills, Chromatin immunoprecipitation (ChIP) methodology  
265 and readouts. *Methods Mol Biol* 505 (2009) 123-37.

266 [31] B.G. Hoffman, and S.J. Jones, Genome-wide identification of DNA-protein  
267 interactions using chromatin immunoprecipitation coupled with flow cell  
268 sequencing. *J Endocrinol* 201 (2009) 1-13.

269 [32] E.A. Hunt, A.M. Goulding, and S.K. Deo, Direct detection and quantification of  
270 microRNAs. *Anal Biochem* 387 (2009) 1-12.

271 [33] A. Abbott, Laboratory animals: the Renaissance rat. *Nature* 428 (2004) 464-6.  
272  
273
